# Supplementary material
Source: publisher figshare collection journal article supplement (https://tandf.figshare.com/ndownloader/files/14082029)
Supplement: Supplementary file 1 [file 14082029]

**Supporting Information**

**Synthesis, characterization of benzimidazole carboxamide derivatives as potent Anaplastic lymphoma kinase inhibitor and antioxidant activity**

D. Sam Daniel Prabua, Sivalingam Lakshmanana, N. Ramalakshmia*, K. Thirumurugana, Dharman Govindarajb, S. Arul Antonya

aPG and Research Department of Chemistry, Presidency College, Chennai -600005, India; bBiomaterials in Medicinal Chemistry Lab, Department of Natural Products Chemistry, School of Chemistry, Madurai Kamaraj University, Madurai, 625021, India.

*****Email address: lachuchem666@gmail.com; Tel: +91-9843632843

**Spectral data for all the compounds**

**N-benzyl-1-(2'-cyano-4-biphenyl-4-yl)methyl-2-ethoxy-7-(1H)-benzimidazole carboxamide (7a)**

Colourless solid in 74% yield; mp: 230-232 °C.1H-NMR (500MHz, DMSO-*d6*): δ (ppm) 1.40 (t, J = 7.1 Hz, 3H, -CH3); 4.38-4.39 (2H, m, -CH2); 4.60 (q, J = 7.3 Hz, 2H, -CH2); 5.55 (2H, s, -CH2); 7.10 (d, J = 8.3 Hz, 2H, ArH); 7.16 (t, J = 7.7 Hz, 1H, ArH); 7.22 (dd, J = 7.70 Hz, 2H, ArH); 7.25-7.26 (4H, m, ArH); 7.44 (d, J = 8.4 Hz, 2H, ArH); 7.54-7.58 (3H, m, ArH); 7.77 (td J = 6.9 Hz,, 1H, ArH); 7.94 (dd, J = 7.7 Hz, 1H, ArH); 8.98 (t, J = 6.1 Hz, 1H, -NH). 13C NMR: 14.92, 46.04, 66.87, 110.47, 119.01, 119.80, 121.11, 121.36, 127.18, 128.73, 129.33, 130.21, 134.03, 137.11, 138.48, 139.65, 141.45, 158.30, 167.40. FT-IR (KBr): 3453.88 (C-H), 2361.49 (C=C), 1639.2 (C=O), 1417.42 (C-N), 753.56 (C-O) cm-1. ESI-MS m/z: 487.1 (M + H);Anal. Calcd for C31H26N4O2: C, 76.52; H, 5.39, N, 11.51; Found: C, 76.54; H, 5.35, N, 11.53.

**4-methoxy-benzyl-1-(2'-Cyano-4-biphenyl-4-yl)methyl-2-ethoxy-7-(1H)-benzimidazole carboxamide (7b)**

Colourless solid in 78% yield; mp: 214-216 °C. 1H-NMR (500MHz, DMSO-*d6*): δ (ppm) 1.40 (t, J = 7.1 Hz, 3H, -CH3); 3.64 (3H, s, -OCH3); 4.31-4.32 (2H, m, -CH2); 4.60 (q, J = 8.3 Hz, 2H, -CH2); 5.49 (2H, s, -CH2); 6.79-6.81 (2H, m, ArH); 7.09 (d, J = 8.3 Hz, 2H, ArH); 7.14-7.18 (4H, m, ArH); 7.42 (d, J = 8.3 Hz, 2H, ArH); 7.55-7.57 (3H, m, ArH); 7.77 (td, J = 7.7 Hz, 1H, ArH); 7.94 (dd, J = 7.7 Hz, 1H, ArH); 8.92 (t, J = 6.0 Hz, 1H, -NH). 13C NMR: 14.92, 42.48, 46.01, 55.38, 66.86, 110.45, 114.08, 119.00, 121.08, 121.54, 128.70, 129.15, 130.18, 134.01, 137.08, 138.45, 141.58, 144.44, 158.28, 167.23. FT-IR (KBr): 3458.71 (C-H), 2362.37 (C=C), 1630.52 (C=O), 1470.46 (C-N), 717.39 (C-O) cm-1. ESI-MS m/z: 517.1 (M + H);Anal. Calcd for C32H28N4O3:C, 74.40; H, 5.46; N, 10.85; Found: C, 74.42; H, 5.44; N, 10.88.

**4-fluoro-benzyl-1-(2'-Cyano-4-biphenyl-4-yl)methyl-2-ethoxy-7-(1H)-benzimidazole carboxamide (7c)**

Colourless solid in 76% yield; mp: 224-226 °C. 1H-NMR (300MHz, CDCl3): δ (ppm) 1.49 (t, J = 7.1 Hz, 3H, -CH3); 4.22-4.24 (2H, m, -CH2); 4.26 (q, J = 7.3 Hz, 2H, -CH2); 5.52 (2H, s, -CH2); 6.48 (1H, s, -NH); 6.94-6.96 (3H, m, ArH); 7.12 (d, J = 8.3 Hz, 2H, ArH); 7.14-7.17 (2H, m, ArH); 7.24 (d, J = 8.3 Hz, 2H, ArH); 7.26-7.47 (2H, m, ArH); 7.76 (td, J = 7.3 Hz, 2H, ArH). 13C NMR: 14.08, 42.70, 46.47, 67.16, 110.06, 114.61, 119.70, 125.26, 126.24, 128.63, 129.42, 131.35, 134.99, 136.44, 141.52, 145.19, 157.78, 167.23. FT-IR (KBr): 3298.64 (C-H), 1539.88(C=C), 1637.27 (C=O), 1475.28 (C-N), 742.46(C-O) cm-1. ESI-MS m/z: 505.1 (M - H); Anal. Calcd for C31H25FN4O2; C, 73.79; H, 4.99; N, 11.10; Found: C, 73.81; H, 4.51; N, 11.13.

**3,4-dichloro-benzyl-1-(2'-Cyano-4-biphenyl-4-yl)methyl-2-ethoxy-7-(1H) benzimidazole carboxamide (7d)**

Colourless solid in 72% yield; mp: 224-226°C. 1H-NMR (300MHz, CDCl3): δ (ppm) 1.51 (t, J = 7.1 Hz, 3H, -CH3); 4.28-4.30 (2H, m, -CH2); 4.70 (q, J = 7.3 Hz, 2H, -CH2); 5.59 (2H, s, -CH2); 6.10(1H, s, -NH); 7.06-7.08 (3H, m, ArH); 7.12 (d, J = 8.3 Hz, 2H, ArH); 7.26 (d, J = 7.9 Hz, 2H, ArH); 7.32-7.36 (2H, m, ArH); 7.38-7.42 (2H, m, ArH); 7.73 (td, J = 7.2 Hz, 3H, ArH). 13C NMR: 14.17, 42.97, 46.37, 66.90, 110.88, 114.27, 120.58, 123.09, 126.24, 128.30, , 130.11, 134.26, 135.85, 141.58, 144.68, 158.24, 167.31. FT-IR (KBr): 3457.74 (C-H), 2361.41 (C=C), 1637.27 (C=O), 1467.56 (C-N), 728.96 (C-O) cm-1. ESI-MS m/z: 556.1 (M + H); Anal. Calcd for C31H24Cl2N4O2; C, 67.03; H, 4.36; N, 10.09; Found: C, 67.06; H, 4.38; N, 10.11.

**2-chloro-benzyl-1-(2'-Cyano-4-biphenyl-4-yl)methyl-2-ethoxy-7-(1H)-benzimidazole carboxamide (7e)**

Colourless solid in 80% yield; mp: 228-230 °C. 1H-NMR (500MHz, DMSO-*d6*): δ (ppm) 1.39 (t, J = 7.1 Hz, 3H, -CH3); 4.42-4.44 (2H, m, -CH2); 4.60 (q, J = 7.3 Hz, 2H, -CH2); 5.58 (2H, s, -CH2); 6.14 (1H, s, -NH); 6.20 (3H, m, ArH); 7.11 (d, J = 8.3 Hz, 2H, ArH); 7.16-7.20 (2H, m, ArH); 7.29 (td, J = 7.6 Hz, 2H, ArH); 7.42 (dd, J = 7.2 Hz, 2H, ArH); 7.48 (dd, J = 7.9 Hz, 1H, ArH); 7.58 (m, 2H, ArH); 7.77 (td, J = 7.9 Hz, 1H, ArH); 7.92-7.94 (1H, m, ArH); 9.00 (t, J = 5.9 Hz, 1H, -NH). 13C NMR: 14.41, 42.40, 46.49, 67.06, 110.21, 114.15, 119.44, 121.97, 123.14, 127.09, 129.42, 130.56, 134.92, 137.00, 141.06, 144.18, 157.09, 167.47. FT-IR (KBr): 3458.71 (C-H), 2361.41 (C=C), 1633.41 (C=O), 1466.53 (C-N), 734.74 (C-O) cm-1. ESI-MS m/z: 522.1 (M + H); Anal. Calcd for C31H25ClN4O2; C, 71.46; H, 4.84; N, 10.75; Found: C, 71.49; H, 4.83; N, 10.76.

**3,5-bis (Triflouromethyl)- benzyl- 1-(2'-Cyano-4-biphenyl-4-yl)methyl-2-ethoxy-7-(1H)-benzimidazole carboxamide (7f)**

Colourless solid in 82% yield; mp: 232-234 °C. 1H-NMR (300MHz, CDCl3): δ (ppm) 1.49 (t, J = 7.1 Hz, 3H, -CH3); 4.40-4.42 (2H, m, -CH2); 4.74 (q, J = 7.3 Hz, 2H, -CH2); 5.58 (2H, s, -CH2); 6.18 (1H, s, -NH); 7.04-7.07 (3H, m, ArH); 7.10 (d, J = 8.3 Hz, 1H, ArH); 7.14 (t, J = 7.7 Hz, 2H, ArH); 7.26-7.35 (2H, m, ArH); 7.38-7.48 (3H, m, ArH); 7.62-7.73 (3H, m, ArH).

13C NMR: 14.12, 42.40, 46.92, 67.76, 110.55, 114.61, 119.00, 123.53, 126.17, 128.42, 129.49, 131.36, 133.94, 136.21, 141.82, 144.40, 157.80, 167.84. FT-IR (KBr): 3451.96 (C-H), 2361.41 (C=C), 1638.23 (C=O), 1467.56 (C-N), 678.82 (C-O) cm-1. ESI-MS m/z: 623.1 (M - H); Anal. Calcd for C33H24F6N4O2; C, 63.67; H, 3.89; N, 9.02; Found: C, 63.69; H, 3.92; N, 9.01.

**3-methoxy-benzyl-1-(2'-Cyano-4-biphenyl-4-yl)methyl-2-ethoxy-7-(1H)- benzimidazole carboxamide (7g)**

Colourless solid in 84% yield; mp: 214-216 °C. 1H-NMR (300MHz, CDCl3): δ (ppm) 1.47 (t, J = 7.1 Hz, 3H, -CH3); 3.73 (3H, s, -OCH3); 4.38-4.40 (2H, m, -CH2); 4.97-4.99 (2H, m, -CH2); 5.63-5.66 (2H, s, -CH2); 6.41(1H, s, -NH); 6.77-6.84 (q, J = 7.3 Hz, 3H, -ArH); 7.01-7.02 (3H, m, ArH); 7.13-7.19 (3H, m, ArH); 7.22-7.27 (2H, m, ArH); 7.42-7.46 (2H, m, ArH); 7.62-7.67 (2H, m, ArH). 13C NMR: 14.20, 42.89, 46.99, 56.61, 66.65, 110.99, 114.06, 119.11, 121.37, 123.37, 128.81, 129.90, 131.07, 134.41, 137.35, 138.85, 141.87, 144.46, 157.42, 167.13. FT-IR (KBr): 3457.74 (C-H), 2361.41 (C=C), 1636.31 (C=O), 1465.63 (C-N), 566.96 (C-O) cm-1. ESI-MS m/z: 517.1 (M + H); Anal. Calcd for C32H28N4O3; C, 74.40; H, 5.46; N, 10.85; Found: C, 74.45; H, 5.47; N, 10.89.

**4-methyl-benzyl-1-(2'-Cyano-4-biphenyl-4-yl)methyl-2-ethoxy-7-(1H)-benzimidazole carboxamide ( 7h)**

Colourless solid in 78% yield; mp: 212-214°C. 1H-NMR (500MHz, DMSO-*d6*): δ (ppm) 1.40 (t, J = 7.1 Hz, 3H, -CH3); 4.33-4.34 (d, J = 6.0 Hz, 2H, -CH2); 4.59-4.62 (q, J = 7.1 Hz, 2H, -CH2); 5.49 (2H, s, -CH2); 6.40 (1H, s, -NH); 7.03 (dd, J = 7.6 Hz, 2H, ArH); 7.07-7.09 (2H, m, ArH); 7.13-7.16 (3H, m, ArH); 7.40 (d, J = 8.3 Hz, 2H, ArH); 7.55-7.57 (d, J = 9.0 Hz, 2H, ArH); 7.76 (td, J = 7.7 Hz, 1H, ArH); 7.92-7.95 (1H, m, ArH); 8.95 (t, J = 6.1 Hz, 1H, -NH). 13C NMR: 14.41, 19.01, 20.58, 30.74, 35.74, 42.28, 45.54, 54.46, 46.03, 66.35, 109.98, 111.09, 119.26, 120.58, 127.02, 127.30, 128.76, 129.99, 133.50, 133.90, 157.79, 162.28, 166.79. FT-IR (KBr): 3437.49 (C-H), 2360.44 (C=C), 1656.55 (C=O), 1471.42 (C-N), 568.89 (C-O) cm-1. ESI-MS m/z 501.1 (M+H); Anal.Calcd for C32H28N4O2; C, 76.78; H, 5.64; N, 11.19; Found: C, 76.81; H, 5.68; N, 11.23.

**4- pyridyl-1- (2'-Cyano-4-biphenyl-4-yl)methyl-2- ethoxy-7- (1H)- benzimidazole carboxamide (7i)**

Colourless solid in 80% yield; mp: 204-206 °C. 1H-NMR (300MHz, CDCl3): δ (ppm) 1.43 (t, J = 7.2 Hz, 3H, -CH3); 4.42-4.43 (2H, m, -CH2); 4.64-4.72 (2H, m, -CH2); 5.42 (2H, s, -CH2); 6.24(1H, s, -NH); 7.02-7.05 (2H, m, ArH); 7.20-7.27 (2H, m, ArH); 7.37-7.40 (2H, m, ArH); 7.45-7.47 (4H, m, ArH); 7.67-7.74 (3H, m, ArH); 8.41-8.43 (2H, m, ArH). 13C NMR: 14.44, 44.23, 46.46, 66.49, 110.23, 114.38, 119.78, 121.06, 121.70, 126.43, 128.63, 130.55, 131.47, 133.41, 137.83, 139.75, 141.12, 143.89, 157.88, 167.07. FT-IR (KBr): 3436.53 (C-H), 2361.41 (C=C), 1644.98 (C=O), 1473.35 (C-N), 700.99 (C-O) cm-1. ESI-MS m/z: 488.1 (M + H); Anal. Calcd for C30H25N5O2; C, 73.90; H, 5.17; N, 14.36; Found: C, 73.92; H, 5.19; N, 14.34.

**3-pyridyl-1-(2'-Cyano-4-biphenyl-4-yl) methyl-2-ethoxy-7-(1H)- benzimidazole carboxamide (7j)**

Colourless solid in 84% yield; mp: 208-210 °C. 1H-NMR (500MHz, DMSO-*d6*): δ (ppm) 1.39-42 (t, J = 7.1 Hz, 3H, -CH3); 4.39-4.40 (d, J = 5.9 Hz, 2H, -CH2); 4.58-4.62 (2H, m, -CH2); 5.48 (2H, s, -CH2); 7.05-7.07 (d, J = 8.3 Hz, 2H, ArH); 7.14-7.17 (t, J = 7.7 Hz, 1H, ArH); 7.21-7.22 (d, J = 6.7 Hz, 1H,ArH); 7.25-7.27 (dd, J = 7.6 Hz, 1H, ArH); 7.42-7.44 (d, J = 8.3 Hz, 2H, ArH); 7.56-7.59 (4H, m, ArH); 7.76-7.78 (t, J = 7.7 Hz, 1H, ArH); 7.92-7.94 (d, J = 7.4 Hz, 1H, ArH); 8.41-8.42 (1H, m, ArH); 8.51-8.52 (d, J = 1.4 Hz, 1H, ArH); 9.02-9.04 (t, J = 5.9 Hz, 1H, -NH). 13C NMR: 14.77, 41.73, 46.51, 66.75, 109.93, 114.06, 120.69, 121.35, 126.10, 127.70, 130.26, 133.41, 139.08, 140.38, 141.68, 143.23, 148.30, 157.85, 167.72. FT-IR (KBr): 3470.28 (C-H), 2362.37 (C=C), 1635.34 (C=O), 1470.46 (C-N), 737.63 (C-O) cm-1. ESI-MS m/z: 488.1 (M + H); Anal. Calcd for C30H25N5O2; C, 73.90; H, 5.17; N, 14.36; Found: C, 73.93; H, 5.18; N, 14.39.

**Spectrum of synthesized compounds**

**Fig.S1.** 1H-NMR Spectrum of N-benzyl-1-(2'-cyano-4-biphenyl-4-yl)methyl-2-ethoxy-7-(1H)-benzimidazole carboxamide (7a)

**Fig.S2.** 13C-NMR Spectrum of N-benzyl-1-(2'-cyano-4-biphenyl-4-yl)methyl-2-ethoxy-7-(1H)-benzimidazole carboxamide (7a)

**Fig.S3**. 1H-NMR Spectrum of 4-methoxy-benzyl-1-(2'-Cyano-4-biphenyl-4-yl)methyl-2-ethoxy-7-(1H)- benzimidazole carboxamide (7b)

**Fig.S4.** 13C-NMR Spectrum of 4-methoxy-benzyl-1-(2'-Cyano-4-biphenyl-4-yl)methyl-2-ethoxy-7-(1H)- benzimidazole carboxamide (7b)

**Fig.S5.** 1H-NMR Spectrum of 4-fluoro-benzyl-1-(2'-Cyano-4-biphenyl-4-yl)methyl-2-ethoxy-7-(1H)-benzimidazole carboxamide (7c)

**Fig.S6.** 13C-NMR Spectrum of 4-fluoro-benzyl-1-(2'-Cyano-4-biphenyl-4-yl)methyl-2-ethoxy-7-(1H)-benzimidazole carboxamide (7c)

**Fig.S7.** 1H-NMR Spectrum of 3,4-dichloro-benzyl-1-(2'-Cyano-4-biphenyl-4-yl)methyl-2-ethoxy-7-(1H) benzimidazole carboxamide (7d)

**Fig.S8.** 13C-NMR Spectrum of 3,4-dichloro-benzyl-1-(2'-Cyano-4-biphenyl-4-yl)methyl-2-ethoxy-7-(1H) benzimidazole carboxamide (7d)

**Fig.S9.** 1H-NMR Spectrum of 2-chloro-benzyl-1-(2'-Cyano-4-biphenyl-4-yl)methyl-2-ethoxy-7-(1H)-benzimidazole carboxamide (7e)

**Fig.S10.** 13C-NMR Spectrum of 2-chloro-benzyl-1-(2'-Cyano-4-biphenyl-4-yl)methyl-2-ethoxy-7-(1H)-benzimidazole carboxamide (7e)

**Fig.S11.** 1H-NMR Spectrum of 3,5-bis (Triflouromethyl)- benzyl- 1-(2'-Cyano-4-biphenyl-4-yl)methyl-2-ethoxy-7-(1H)-benzimidazole carboxamide (7f)

**Fig.S12.** 13C-NMR Spectrum of 3,5-bis (Triflouromethyl)- benzyl- 1-(2'-Cyano-4-biphenyl-4-yl)methyl-2-ethoxy-7-(1H)-benzimidazole carboxamide (7f)

**Fig.S13.** 1H-NMR Spectrum of 3-methoxy-benzyl-1-(2'-Cyano-4-biphenyl-4-yl)methyl-2-ethoxy-7-(1H)- benzimidazole carboxamide (7g)

**Fig.S14.** 13C-NMR Spectrum of 3-methoxy-benzyl-1-(2'-Cyano-4-biphenyl-4-yl)methyl-2-ethoxy-7-(1H)- benzimidazole carboxamide (7g)

**Fig.15.** 1H-NMR Spectrum of 4-methyl-benzyl-1-(2'-Cyano-4-biphenyl-4-yl)methyl-2-ethoxy-7-(1H)-benzimidazole carboxamide ( 7h)

**Fig.16.** 13C-NMR Spectrum of 4-methyl-benzyl-1-(2'-Cyano-4-biphenyl-4-yl)methyl-2-ethoxy-7-(1H)-benzimidazole carboxamide ( 7h)

**Fig.17.** 1H-NMR Spectrum of 4- pyridyl-1- (2'-Cyano-4-biphenyl-4-yl)methyl-2- ethoxy-7- (1H)- benzimidazole carboxamide (7i)

**Fig.18.** 13C-NMR Spectrum of 4- pyridyl-1- (2'-Cyano-4-biphenyl-4-yl)methyl-2- ethoxy-7- (1H)- benzimidazole carboxamide (7i)

**Fig.19.** 1H-NMR Spectrum of 3-pyridyl-1-(2'-Cyano-4-biphenyl-4-yl) methyl-2-ethoxy-7-(1H)- benzimidazole carboxamide (7j)

**Fig.20.** 13C-NMR Spectrum of 3-pyridyl-1-(2'-Cyano-4-biphenyl-4-yl) methyl-2-ethoxy-7-(1H)- benzimidazole carboxamide (7j)
